# Supplementary material for: Insulin and Metformin Regulate Circulating and Adipose Tissue Chemerin
Source: Oxford University Press journal article supplement (doi:10.2337/db08-1528), 2009-06-05
Supplement: db081528-sup-appendix.doc [file db081528-sup-appendix.doc]

**Supplemental Data**

# Table 1: Linear regression analysis of variables associated with changes in serum chemerin levels (before and after metformin treatment), ∆Chemerin, in PCOS subjects (*n* = 21).

| (A) | Simple | | Multiple | |
| --- | --- | --- | --- | --- |
| Variable | Estimate | *P* | Estimate | *P* |
| ∆BMI (kg/m2) | 0.156 | 0.500 | 0.201 | 0.518 |
| ∆WHR | 0.486 | 0.026 | 0.447 | 0.105 |
| ∆Glucose (mmol/L) | 0.510 | 0.018 | - | - |
| ∆Insulin (pmol/L) | 0.503 | 0.020 | 0.123 | 0.646 |
| ∆HOMA-IR | 0.772 | < 0.010 | - | *-* |
| ∆Cholesterol (mmol/L) | 0.276 | 0.226 | - | - |
| ∆Triglycerides (mmol/L) | 0.490 | 0.024 | - | *-* |
| ∆E2 (pmol/L) | 0.240 | 0.327 | - | - |
| ∆Testosterone (nmol/L) | -0.130 | 0.576 | - | - |
| ∆Androstenedione (nmol/L) | 0.039 | 0.867 | - | - |
| ∆DHEA-S (μmol/L) | -0.055 | 0.814 | - | - |
| ∆SHBG (nmol/L) | 0.236 | 0.304 | - | *-* |
| ∆FAI | -0.224 | 0.330 | - | - |
| ∆Leptin (ng/ml) | -0.003 | 0.989 | -0.037 | 0.889 |
| ∆Adiponectin (μg/ml) | 0.026 | 0.911 | 0.066 | 0.843 |

In multiple linear regression analysis, values included were BMI, WHR, insulin, leptin and adiponectin.

# Table 2: Linear regression analysis of variables associated with changes in serum chemerin levels (before and after metformin treatment), ∆Chemerin, in PCOS subjects (*n* = 21).

| (A) | Simple | | Multiple | |
| --- | --- | --- | --- | --- |
| Variable | Estimate | *P* | Estimate | *P* |
| ∆BMI (kg/m2) | 0.156 | 0.500 | 0.057 | 0.781 |
| ∆WHR | 0.486 | 0.026 | 0.258 | 0.285 |
| ∆Glucose (mmol/L) | 0.510 | 0.018 | - | - |
| ∆Insulin (pmol/L) | 0.503 | 0.020 | - | - |
| ∆HOMA-IR | 0.772 | < 0.010 | - | *-* |
| ∆Cholesterol (mmol/L) | 0.276 | 0.226 | 0.336 | 0.149 |
| ∆Triglycerides (mmol/L) | 0.490 | 0.024 | 0.456 | 0.086 |
| ∆E2 (pmol/L) | 0.240 | 0.327 | - | - |
| ∆Testosterone (nmol/L) | -0.130 | 0.576 | - | - |
| ∆Androstenedione (nmol/L) | 0.039 | 0.867 | - | - |
| ∆DHEA-S (μmol/L) | -0.055 | 0.814 | - | - |
| ∆SHBG (nmol/L) | 0.236 | 0.304 | 0.021 | 0.921 |
| ∆FAI | -0.224 | 0.330 | - | - |
| ∆Leptin (ng/ml) | -0.003 | 0.989 | - | *-* |
| ∆Adiponectin (μg/ml) | 0.026 | 0.911 | - | - |

In multiple linear regression analysis, values included were BMI, WHR, cholesterol, triglycerides and SHBG.
